# Supplementary material
Source: PubMed Central journal article supplement (PMC9274869)
Supplement: Supplementary_material.pdf [file Supplementary_material.pdf]

| Direction       | Finger | Laterality | Mean by Gender (mm) | <i>p-value</i> |
|-----------------|--------|------------|---------------------|----------------|
| RADIAL TO ULNAR | Index  | R          | 3.2                 | 1.000          |
|                 |        | L          | 3.0                 |                |
|                 | Middle | R          | 3.2                 | 0.755          |
|                 |        | L          | 2.9                 |                |
|                 | Ring   | R          | 2.7                 | 1.000          |
|                 |        | L          | 2.6                 |                |
|                 | Small  | R          | 3.8                 | 1.000          |
|                 |        | L          | 3.8                 |                |

| Direction       | Finger | Gender | Mean by Gender (mm) | <i>p-value</i> |
|-----------------|--------|--------|---------------------|----------------|
| VOLAR TO DORSAL | Index  | R      | 3.5                 | 1.000          |
|                 |        | L      | 3.2                 |                |
|                 | Middle | R      | 3.8                 | 0.426          |
|                 |        | L      | 3.4                 |                |
|                 | Ring   | R      | 3.2                 | 1.000          |
|                 |        | L      | 3.0                 |                |
|                 | Small  | R      | 3.5                 | 0.882          |
|                 |        | L      | 3.3                 |                |

**Supplemental Material:** Mean diameters of the metacarpal canals at their narrowest point stratified by laterality in the radial to ulnar direction and volar to dorsal direction
